# Supplementary material for: Near-ubiquitous presence of a vancomycin-resistant Enterococcus faecium ST117/CT71/vanB –clone in the Rhine-Main metropolitan area of Germany
Source: PubMed Central journal article supplement (PMC6664515; doi:10.1186/s13756-019-0573-8), 2019-07-29

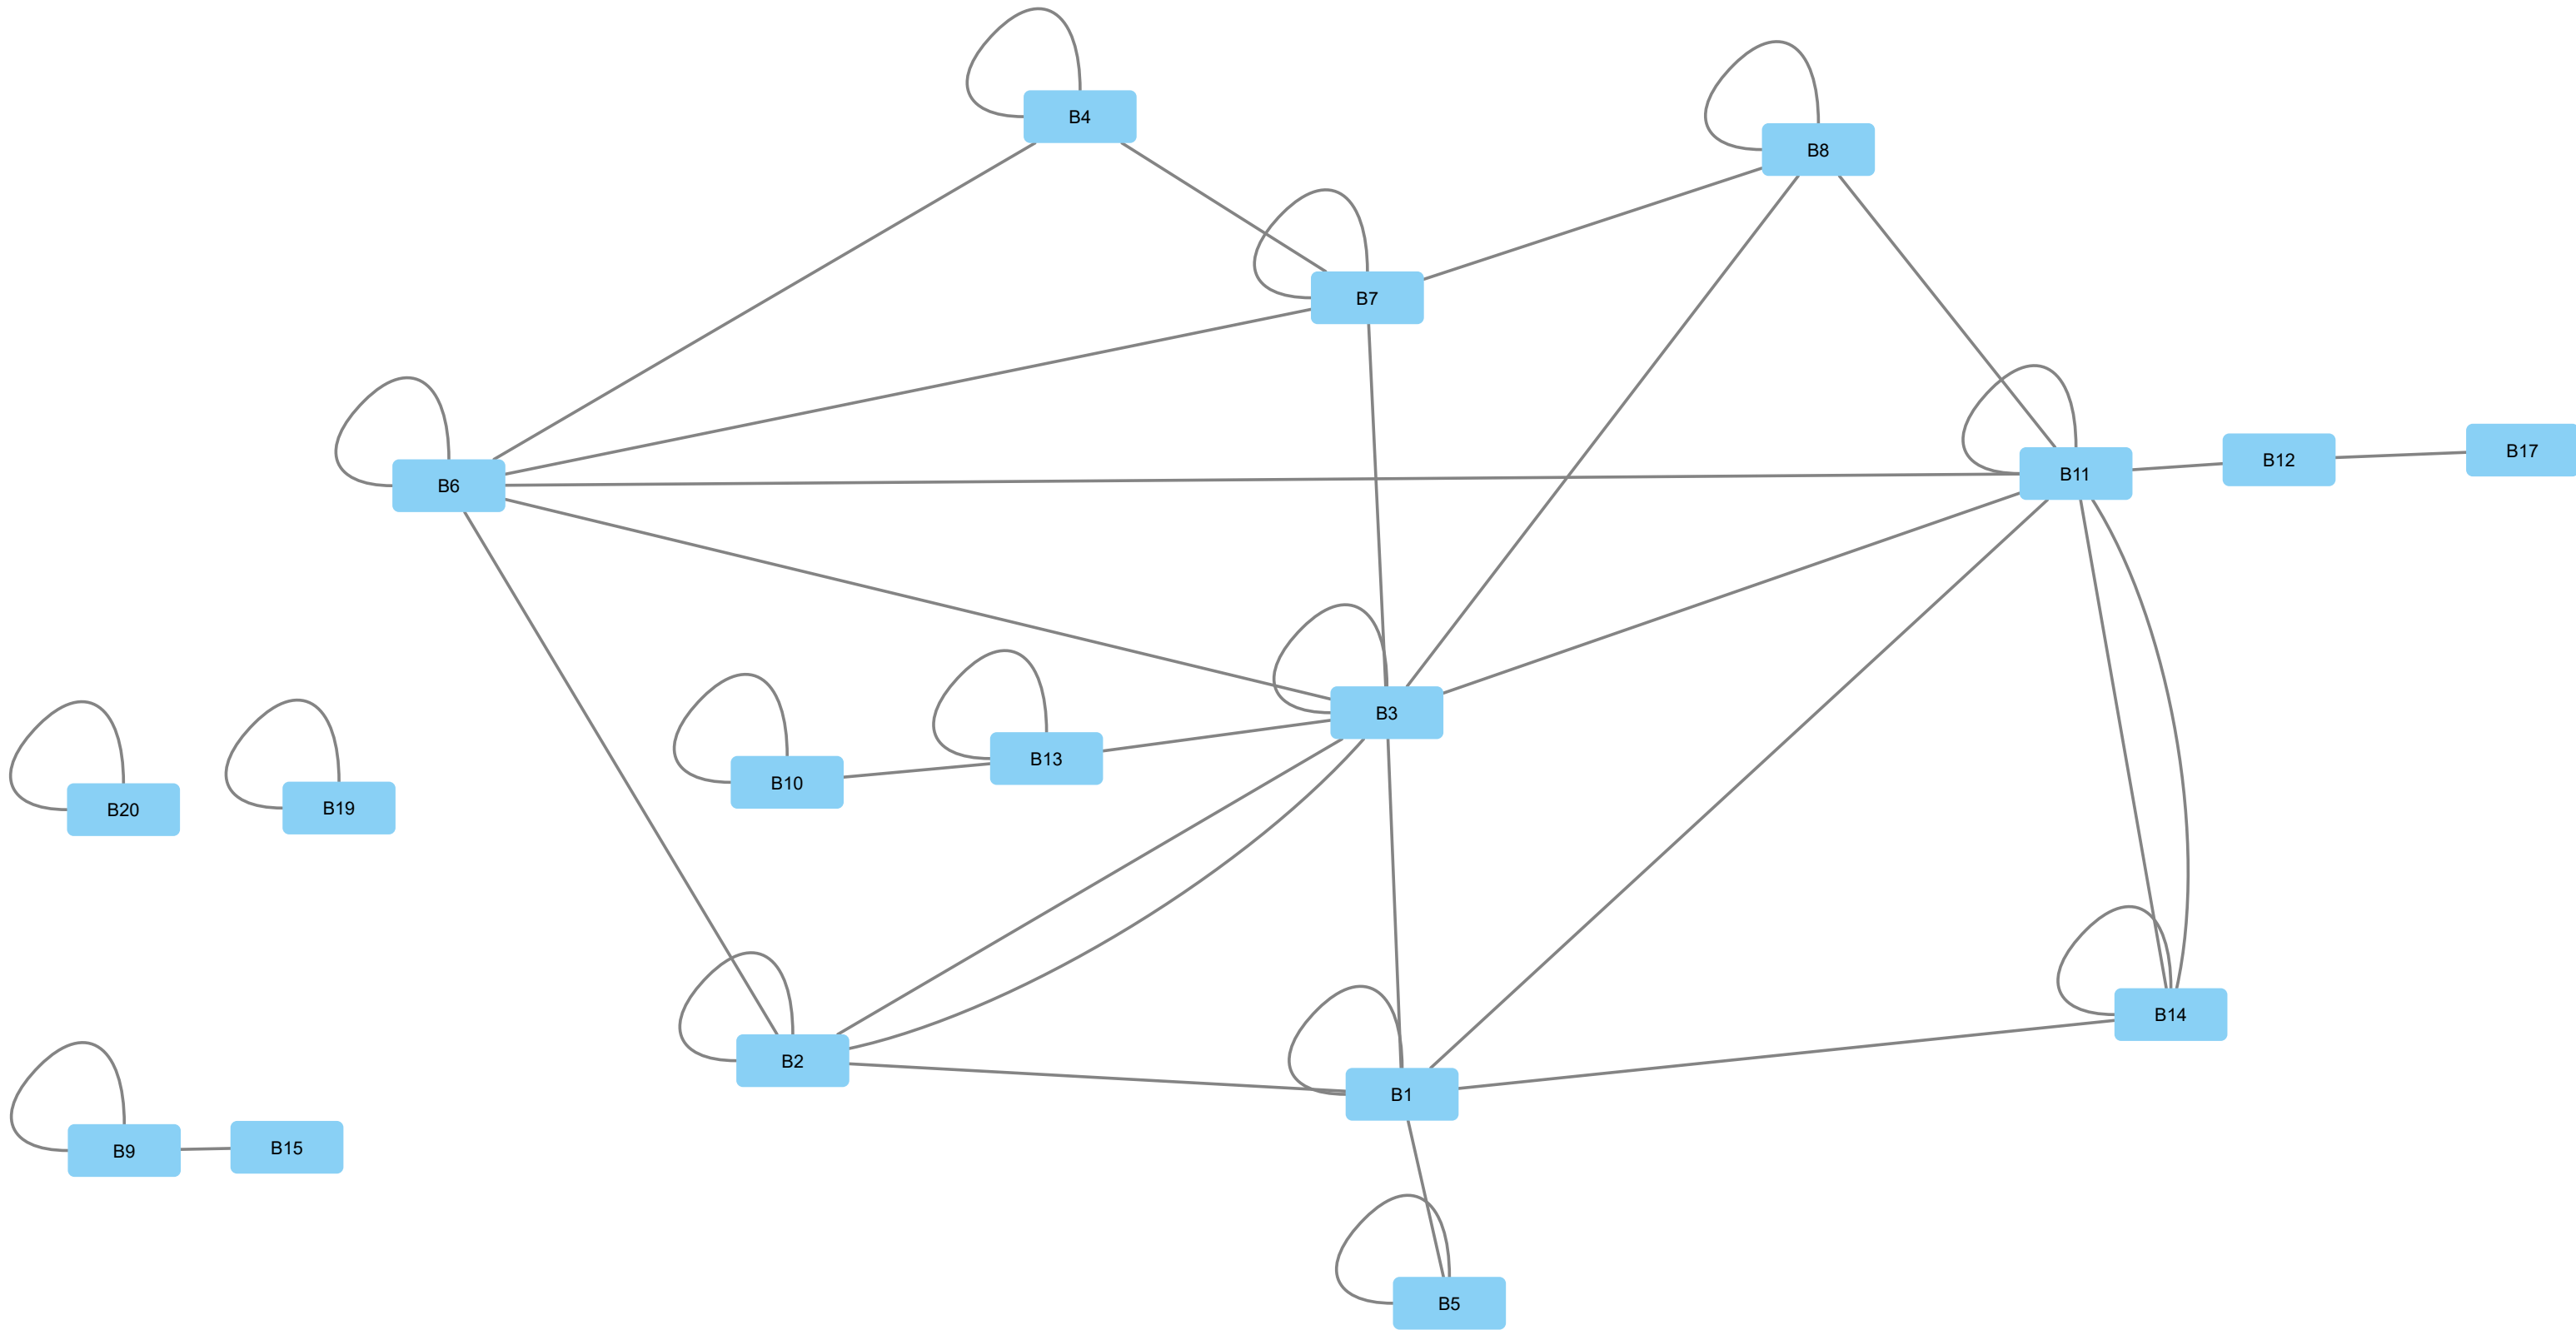

Supplement: 13756_2019_573_MOESM6_ESM.pdf [file 13756_2019_573_MOESM6_ESM.pdf]
